# Supplementary material for: A wireless optoelectronic skin patch for light delivery and thermal monitoring
Source: PubMed Central journal article supplement — iScience. 2021 Oct 21;24(11):103284. doi: 10.1016/j.isci.2021.103284 (PMC8571508; doi:10.1016/j.isci.2021.103284), 2021-10-21
Supplement: mmc1.pdf [file mmc1.pdf]

**iScience, Volume 24**

**Supplemental information**

**A wireless optoelectronic skin patch  
for light delivery and thermal monitoring**

**Han-Joon Kim, Yunxia Jin, Sippanat Achavananthadith, Rongzhou Lin, and John S. Ho**

## Supplemental Information

### Figures

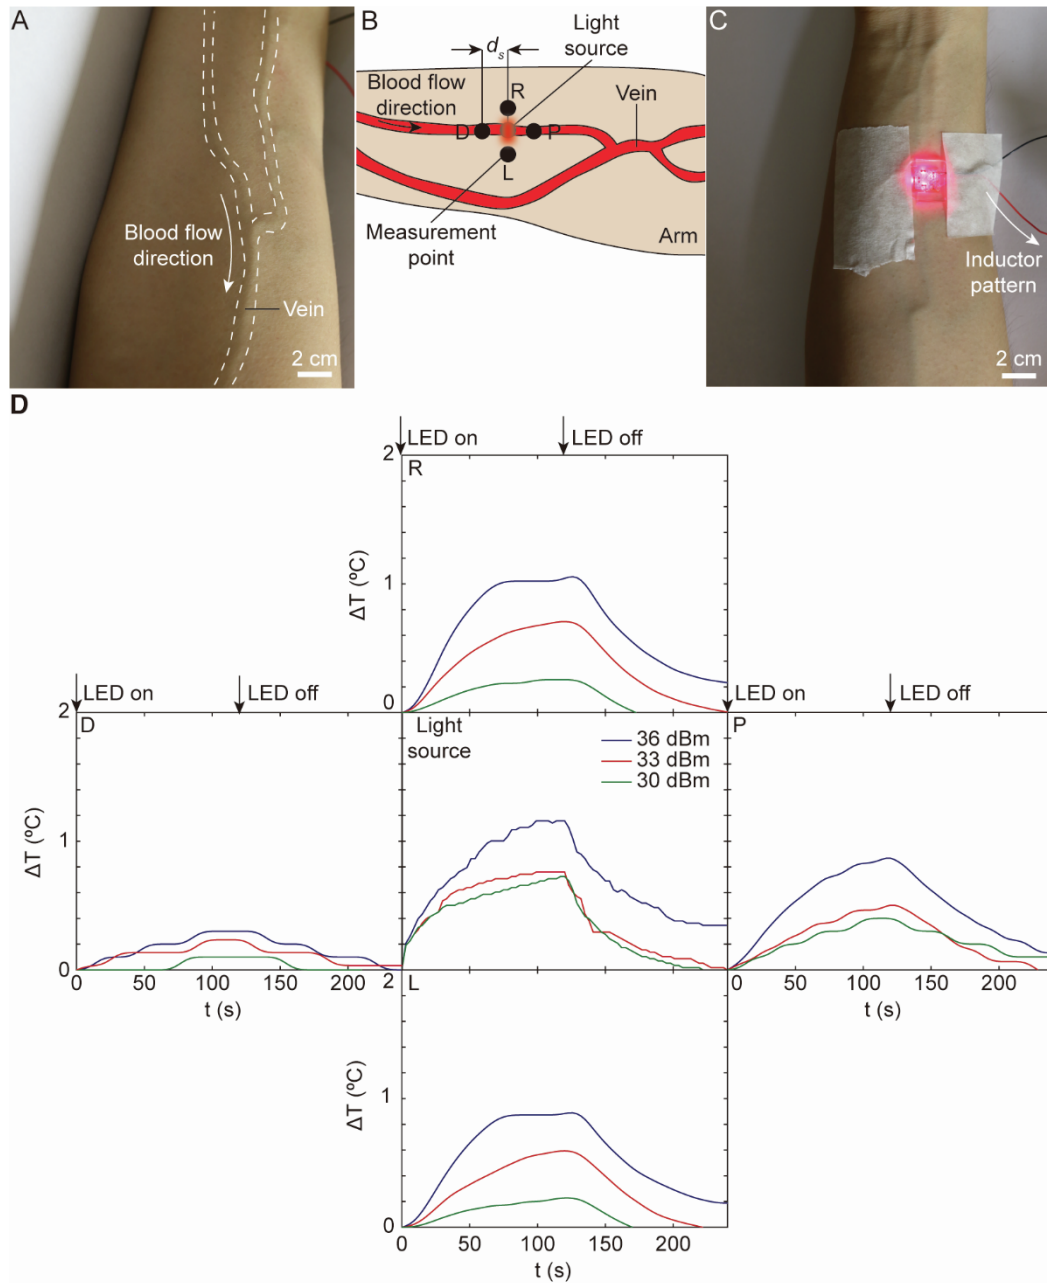

**Figure S1. Alternative sensor arrangement for blood flow monitoring, Related Figure 4.** (A) Image of the subject's forearm with visible radial and ulnar arteries. Arrow indicates direction of blood flow. (B) Schematic of placement of the light source and thermal sensors on the radial artery. The spacing between the sensors is  $d_s=5$  mm. (C) Image of the sensor and LED array. The LED array is detached from the skin patch and fixed on the skin using medical tape to visualize the placement. (D) Temperature profiles measured by the thermal sensors when the LED array is wirelessly powered with input power 30, 33, and 36 dBm. D, distal; P, proximal; L, left; R, right.

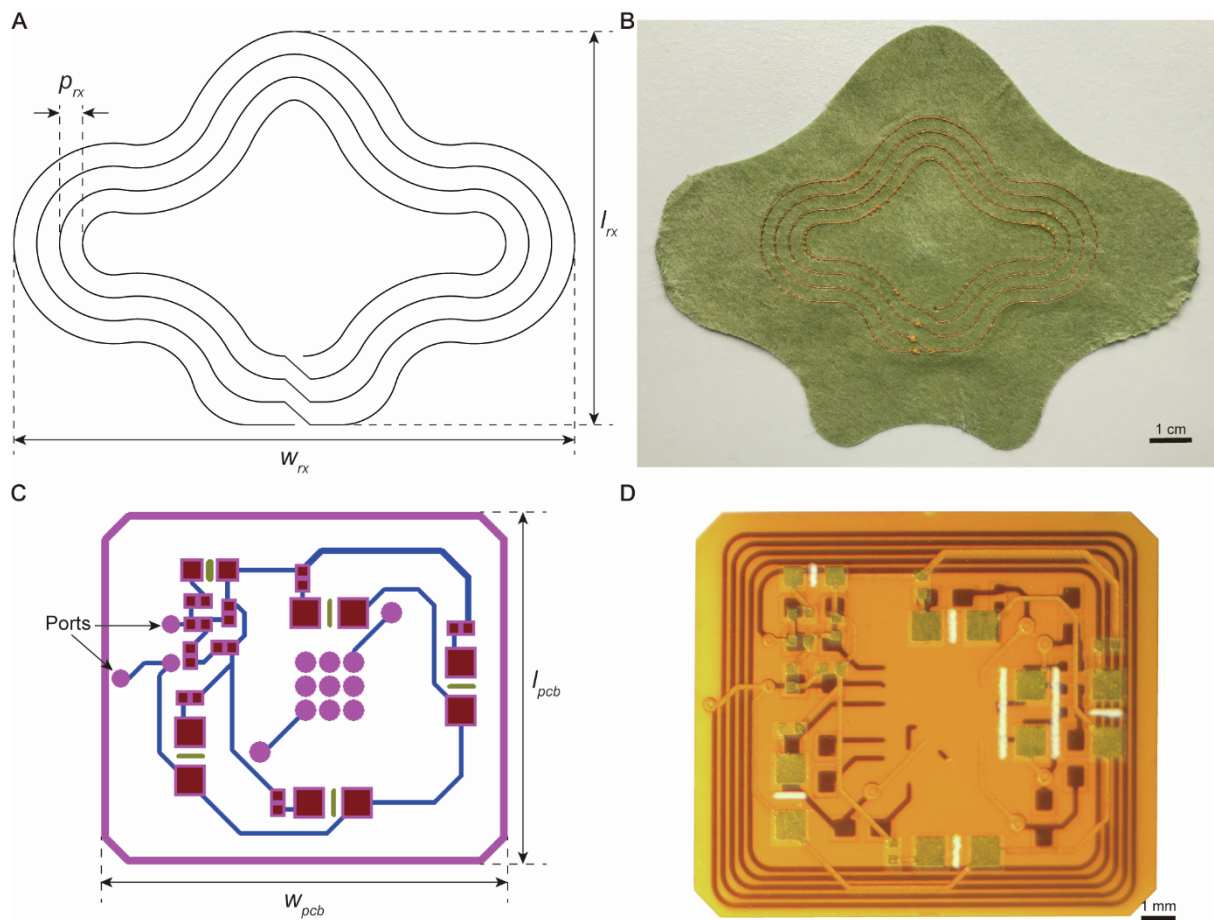

**Figure S2. Detailed design of the skin patch, Related Figure 3.** (A) Illustration of the inductive pattern. The final design parameters are shown in Table 2. (B) Image of the inductive pattern embroidered on the skin patch using copper wire. (C) Schematic of the printed circuit board for the LED array and wireless power circuit. The design is fabricated on a flexible circuit board (PCB). The width ( $w_{PCB}$ ) and length ( $l_{PCB}$ ) of the board are 13.5 and 11.4 mm, respectively. Ports indicate the connection pads for the inductive pattern. (D) Image of the fabricated PCB. The backside of the PCB is not used in this work.

## Tables

**Table S1.** Comparison of transmittance, Related Figure 2.

| Ref.                | Transparent electrodes       | Transmittance (%) | Wavelength (nm) | Sheet resistance ( $\Omega \text{ sq}^{-1}$ ) |
|---------------------|------------------------------|-------------------|-----------------|-----------------------------------------------|
| Jin et al. (2015)   | AgNWs/gel                    | 94.0              | 550             | 50.3                                          |
| Jin et al. (2018)   | AgNWs/Chitosan               | 93.5              | 550             | 18.0                                          |
| Zhang et al. (2019) | AgNWs/PU                     | 84.0              | 550             | 10.6                                          |
| Tang et al. (2019)  | AgNWs/Mxene/PU               | 83.3              | 550             | 26.0                                          |
| Yang et al. (2020)  | AgNWs/GO (laser irradiation) | 91.1              | 550             | 3.3                                           |
| Bi et al. (2020)    | Ag metal                     | 75.0              | 550             | 11.0                                          |
| Bi et al. (2020)    | ZTO/Ag/ZTO                   | 82.0              | 550             | 8.8                                           |
| This work           | AgNWs/GO                     | 93.0              | 550             | 12.0                                          |
